# Supplementary material
Source: ML conference proceedings conference paper supplement (https://proceedings.neurips.cc/paper_files/paper/2015/hash/f2fc990265c712c49d51a18a32b39f0c-Abstract.html)
Supplement: Supplementary file [file f2fc990265c712c49d51a18a32b39f0c-Supplemental.zip]

# Supplementary Material for “HONOR: Hybrid Optimization for NOn-convex Regularized problems”

## A Properties of Clarke Subdifferential

**Proposition 4** According to [8], we have the following properties for Clarke Subdifferential:

- (1) If  $f(\mathbf{x})$  is continuously differentiable then  $\partial^\circ f(\mathbf{x}) = \{\nabla f(\mathbf{x})\}$ .
- (2) Let  $f(\mathbf{x})$  and  $g(\mathbf{x})$  be locally Lipschitz continuous on  $\mathbb{R}^n$ , Then for any  $\mathbf{x} \in \mathbb{R}^n$ , we have
$$\partial^\circ(f(\mathbf{x}) + g(\mathbf{x})) \subseteq \partial^\circ f(\mathbf{x}) + \partial^\circ g(\mathbf{x}).$$

If one of them is continuously differentiable then equality holds.

- (3) We have the following equivalent way to express  $\partial^\circ f(\bar{\mathbf{x}})$ :

$$\partial^\circ f(\bar{\mathbf{x}}) = \text{co} \left\{ \mathbf{g} \in \mathbb{R}^n : \mathbf{g} = \lim_{k \rightarrow \infty} \nabla f(\mathbf{x}^k), \mathbf{x}^k \rightarrow \bar{\mathbf{x}}, \mathbf{x}^k \in \mathcal{D} \right\},$$

where the set  $\mathcal{D}$  is the set of points over which  $f$  is differentiable; co denotes the convex hull of a set.

- (4) For a locally Lipschitz continuous function  $f(\mathbf{x})$ ,  $\partial^\circ f(\mathbf{x})$  is nonempty, convex and compact for each  $\mathbf{x} \in \mathbb{R}^n$ . As a set-valued map  $\partial^\circ f(\mathbf{x})$  is locally bounded and has a closed graph and hence is upper-semicontinuous (upper-hemicontinuous), that is: for every sequence  $\{\mathbf{x}^k\} \rightarrow \mathbf{x}$  and every sequence  $\{\mathbf{y}^k\} \rightarrow \mathbf{y}$  with  $\mathbf{y}^k \in \partial^\circ f(\mathbf{x}^k)$ , we have  $\mathbf{y} \in \partial^\circ f(\mathbf{x})$ .

**Remark 4** For the property (2) above, the equality holds for the subdifferential of convex functions without requiring that one of them is continuously differentiable.

It is generally difficult to compute the Clarke subdifferential of a non-convex function based on its definition. However, according to the above properties and the special structure of the non-convex regularizer, we can obtain the the Clarke subdifferential of  $f(\mathbf{x})$  in problem (1) in the following proposition:

**Proposition 5** Let  $f(\mathbf{x}) = l(\mathbf{x}) + r(\mathbf{x})$  and  $\mathbf{g} \in \partial^\circ f(\mathbf{x})$ . Then, under assumptions (A1) and (A2), the  $i$ -th entry of  $\mathbf{g}$  is

$$\begin{aligned} g_i &= \nabla_i l(\mathbf{x}) + \rho'(|x_i|), & \text{if } x_i > 0, \\ g_i &= \nabla_i l(\mathbf{x}) - \rho'(|x_i|), & \text{if } x_i < 0, \\ g_i &\in [\nabla_i l(\mathbf{x}) - \rho'(0), \nabla_i l(\mathbf{x}) + \rho'(0)], & \text{if } x_i = 0. \end{aligned}$$

**Proof** According to the properties (1) and (2) in Proposition 4, we obtain that, if  $x_i \neq 0$ , then  $g_i = \nabla_i l(\mathbf{x}) + \sigma(x_i)\rho'(|x_i|)$ , which immediately implies the first two. Further considering the property (3) in Proposition 4, the last one is easily obtained.  $\square$

## B Proof of Proposition 1

**Proof** We firstly use contradiction to prove that if  $\liminf_{k \in \mathcal{K}, k \rightarrow \infty} |v_i^k| = 0$  for all  $i \in \{1, \dots, n\}$ , then  $\bar{\mathbf{v}} = \mathbf{0}$ . Assume that  $\liminf_{k \in \mathcal{K}, k \rightarrow \infty} |v_i^k| = 0$  for all  $i \in \{1, \dots, n\}$  but  $\bar{\mathbf{v}} \neq \mathbf{0}$ . Then there exists at least one  $i \in \{1, \dots, n\}$  such that  $\bar{v}_i = -\diamond_i f(\bar{\mathbf{x}}) \neq 0$ . We consider the following two cases:

- (1) If  $\bar{x}_i \neq 0$ , then we have  $\liminf_{k \in \mathcal{K}, k \rightarrow \infty} |v_i^k| = |\bar{v}_i| \neq 0$ , leading to a contradiction with that  $\liminf_{k \in \mathcal{K}, k \rightarrow \infty} |v_i^k| = 0$  for all  $i \in \{1, \dots, n\}$ .
- (2) If  $\bar{x}_i = 0$ , then  $\bar{v}_i = -\diamond_i f(\bar{\mathbf{x}}) \neq 0$  implies that

$$\nabla_i l(\bar{\mathbf{x}}) + \rho'(0) > \nabla_i l(\bar{\mathbf{x}}) - \rho'(0) > 0, \text{ or } \nabla_i l(\bar{\mathbf{x}}) - \rho'(0) < \nabla_i l(\bar{\mathbf{x}}) + \rho'(0) < 0. \quad (21)$$

By the definition of  $v_i^k = -\diamond_i f(\mathbf{x}^k)$ , we know that

$$-(\nabla_i l(\mathbf{x}^k) + \rho'(0)) \leq v_i^k \leq -(\nabla_i l(\mathbf{x}^k) - \rho'(0)).$$

Taking limits of the above inequalities, we have

$$\begin{aligned} -(\nabla_i l(\bar{\mathbf{x}}) + \rho'(0)) &\leq \liminf_{k \in \mathcal{K}, k \rightarrow \infty} v_i^k \leq -(\nabla_i l(\bar{\mathbf{x}}) - \rho'(0)), \text{ and} \\ -(\nabla_i l(\bar{\mathbf{x}}) + \rho'(0)) &\leq \limsup_{k \in \mathcal{K}, k \rightarrow \infty} v_i^k \leq -(\nabla_i l(\bar{\mathbf{x}}) - \rho'(0)), \end{aligned}$$

which together with Eq. (21) imply that

$$\liminf_{k \in \mathcal{K}, k \rightarrow \infty} |v_i^k| \neq 0.$$

This leads to a contradiction with that  $\liminf_{k \in \mathcal{K}, k \rightarrow \infty} |v_i^k| = 0$  for all  $i \in \{1, \dots, n\}$ . Therefore, if  $\liminf_{k \in \mathcal{K}, k \rightarrow \infty} |v_i^k| = 0$  for all  $i \in \{1, \dots, n\}$ , then  $\bar{\mathbf{v}} = \mathbf{0}$ .

To complete the proof, we next prove that  $\bar{\mathbf{x}}$  is a Clarke critical point of problem (1) if  $\bar{\mathbf{v}} = \mathbf{0}$ . According to the definition of the pseudo gradient and Proposition 5, it is easy to verify that

$$\diamond f(\bar{\mathbf{x}}) = \arg \min_{\bar{\mathbf{g}} \in \partial^\circ f(\bar{\mathbf{x}})} \|\bar{\mathbf{g}}\|. \quad (22)$$

Thus,  $\mathbf{0} \in \partial^\circ f(\bar{\mathbf{x}}) \Leftrightarrow \diamond f(\bar{\mathbf{x}}) = \mathbf{0} \Leftrightarrow \bar{\mathbf{v}} = \mathbf{0}$  and hence  $\bar{\mathbf{x}}$  is a Clarke critical point of problem (1) if  $\bar{\mathbf{v}} = \mathbf{0}$ .  $\square$

## C Proof of Proposition 2

**Proof** (i) Based on the definition of  $\mathbf{x}^k(\alpha)$ , we know that  $x_i^k(\alpha)x_i^k \geq 0$ . We next prove for all  $i \in \{1, \dots, n\}$ , the following inequality holds by considering two cases:

$$\nabla_i l(\mathbf{x}^k)(x_i^k(\alpha) - x_i^k) + \rho(|x_i^k(\alpha)|) - \rho(|x_i^k|) \leq -v_i^k(x_i^k(\alpha) - x_i^k). \quad (23)$$

- (a) If  $x_i^k \neq 0$ , then  $x_i^k(\alpha)x_i^k \geq 0$  implies  $|x_i^k(\alpha)| - |x_i^k| = \sigma(x_i^k)(x_i^k(\alpha) - x_i^k)$ . By the concavity of  $\rho(\cdot)$ , we have  $\rho(|x_i^k(\alpha)|) - \rho(|x_i^k|) \leq \rho'(|x_i^k|)(|x_i^k(\alpha)| - |x_i^k|) = \rho'(|x_i^k|)\sigma(x_i^k)(x_i^k(\alpha) - x_i^k)$ , which together with  $\nabla_i l(\mathbf{x}^k) + \rho'(|x_i^k|)\sigma(x_i^k) = -v_i^k$  (by noticing that  $x_i^k \neq 0$ ) implies that Eq. (23) holds.
- (b) If  $x_i^k = 0$ , then we have  $x_i^k(\alpha) = \pi_i(\alpha p_i^k; \sigma(v_i^k)) = \alpha p_i^k$ . We next focus on the case (b) in the following two subcases:
  - (1) If  $p_i^k \neq 0$ , then  $|x_i^k(\alpha)| = \alpha \sigma(p_i^k)p_i^k = \sigma(v_i^k)(\alpha p_i^k) = \sigma(v_i^k)x_i^k(\alpha)$ , which together with the concavity of  $\rho(\cdot)$  and  $\rho(x_i^k) = \rho(0) = 0$  implies that  $\nabla_i l(\mathbf{x}^k)(x_i^k(\alpha) - x_i^k) + \rho(|x_i^k(\alpha)|) - \rho(|x_i^k|) \leq \nabla_i l(\mathbf{x}^k)x_i^k(\alpha) + \rho'(0)\sigma(v_i^k)x_i^k(\alpha)$ , which together with  $x_i^k = 0, v_i^k \neq 0$  and  $\nabla_i l(\mathbf{x}^k) + \rho'(0)\sigma(v_i^k) = -v_i^k$  whenever  $x_i^k = 0$  and  $v_i^k \neq 0$  implies that Eq. (23) holds.
  - (2) If  $p_i^k = 0$ , then  $x_i^k(\alpha) = x_i^k = 0$ , which together with the fact that  $\rho(0) = 0$  implies Eq. (23) holds.

Combining (a) and (b), we obtain that Eq. (23) holds for all  $i \in \{1, \dots, n\}$ , which together with the definition of  $r(\cdot)$  in the assumption (A2) implies that Eq. (6) holds.

(ii) Since  $\nabla l(\mathbf{x})$  is Lipschitz continuous with constant  $L$ , we have

$$l(\mathbf{x}^k(\alpha)) \leq l(\mathbf{x}^k) + \nabla l(\mathbf{x}^k)^T(\mathbf{x}^k(\alpha) - \mathbf{x}^k) + \frac{L}{2}\|\mathbf{x}^k(\alpha) - \mathbf{x}^k\|^2.$$

It follows that

$$f(\mathbf{x}^k(\alpha)) \leq f(\mathbf{x}^k) + \nabla l(\mathbf{x}^k)^T(\mathbf{x}^k(\alpha) - \mathbf{x}^k) + r(\mathbf{x}^k(\alpha)) - r(\mathbf{x}^k) + \frac{L}{2}\|\mathbf{x}^k(\alpha) - \mathbf{x}^k\|^2,$$

which together with Eq. (6) and  $\mathbf{q}_\alpha^k = \frac{1}{\alpha}(\mathbf{x}^k(\alpha) - \mathbf{x}^k)$  implies that Eq. (7) holds.  $\square$

## D Proof of Proposition 3 and Auxiliary Propositions

We present the following proposition which is useful to prove Proposition 3.

**Proposition 6** *Let  $f(\mathbf{x}) = l(\mathbf{x}) + r(\mathbf{x})$  and assumptions (A1) and (A2) hold. If  $\mathbf{p}^k = \pi(\mathbf{d}^k; \mathbf{v}^k)$  is a non-zero vector, where  $\mathbf{v}^k = -\diamond f(\mathbf{x}^k)$ , then the directional derivative of  $f(\mathbf{x})$  at  $\mathbf{x} = \mathbf{x}^k$  along the direction  $\mathbf{p}^k$  defined as*

$$f'(\mathbf{x}^k; \mathbf{p}^k) = \lim_{\alpha \downarrow 0} \frac{f(\mathbf{x}^k + \alpha \mathbf{p}^k) - f(\mathbf{x}^k)}{\alpha} \quad (24)$$

exists and  $f'(\mathbf{x}^k; \mathbf{p}^k) = -(\mathbf{v}^k)^T \mathbf{p}^k < 0$ .

**Proof** Recall that  $l(\mathbf{x})$  is continuously differentiable based on the assumption (A1), so by the mean value theorem, for any  $\alpha > 0$ , there exists an  $\tilde{\alpha} \in [0, \alpha]$  such that  $l(\mathbf{x}^k + \alpha \mathbf{p}^k) - l(\mathbf{x}^k) = \alpha(\mathbf{p}^k)^T \nabla l(\mathbf{x}^k + \tilde{\alpha} \mathbf{p}^k)$ . Thus, we have

$$\lim_{\alpha \downarrow 0} \frac{l(\mathbf{x}^k + \alpha \mathbf{p}^k) - l(\mathbf{x}^k)}{\alpha} = \lim_{\alpha \downarrow 0} \frac{\alpha(\mathbf{p}^k)^T \nabla l(\mathbf{x}^k + \tilde{\alpha} \mathbf{p}^k)}{\alpha} = \nabla l(\mathbf{x}^k)^T \mathbf{p}^k.$$

When  $x_i^k \neq 0$ , there exists an  $\alpha_0 > 0$  such that for any  $\alpha \in (0, \alpha_0]$ ,  $\sigma(x_i^k + \alpha p_i^k) = \sigma(x_i^k) \neq 0$ . Based on Remark 1, we know that  $\rho(|x_i|)$  is continuously differentiable with respect to  $x_i$  in  $(-\infty, 0) \cup (0, \infty)$ . Thus, by the mean value theorem, there exists an  $\tilde{\alpha} \in [0, \alpha]$  such that  $\rho(|x_i^k + \alpha p_i^k|) - \rho(|x_i^k|) = \partial \rho(|x_i^k + \tilde{\alpha} p_i^k|) / \partial (x_i^k + \tilde{\alpha} p_i^k) |x_i^k + \alpha p_i^k - x_i^k| = \rho'(|x_i^k + \tilde{\alpha} p_i^k|) \sigma(x_i^k + \tilde{\alpha} p_i^k) |\alpha p_i^k|$ . Therefore, we have

$$\lim_{\alpha \downarrow 0} \frac{\rho(|x_i^k + \alpha p_i^k|) - \rho(|x_i^k|)}{\alpha} = \lim_{\alpha \downarrow 0} \rho'(|x_i^k + \tilde{\alpha} p_i^k|) \sigma(x_i^k + \tilde{\alpha} p_i^k) |p_i^k| = \rho'(|x_i^k|) \sigma(x_i^k) p_i^k.$$

When  $x_i^k = 0$ , by the continuous differentiability of  $\rho(\cdot)$  in  $[0, \infty)$  and the mean value theorem, we have for any  $\alpha > 0$ , there exists an  $\tilde{\alpha} \in [0, \alpha]$  such that  $\rho(|x_i^k + \alpha p_i^k|) - \rho(|x_i^k|) = \rho(|\alpha p_i^k|) - \rho(0) = \partial \rho(|\tilde{\alpha} p_i^k|) / \partial (|\tilde{\alpha} p_i^k|) (|\alpha p_i^k| - 0) = \rho'(|\tilde{\alpha} p_i^k|) |\alpha p_i^k|$ . Thus, we have

$$\lim_{\alpha \downarrow 0} \frac{\rho(|x_i^k + \alpha p_i^k|) - \rho(|x_i^k|)}{\alpha} = \lim_{\alpha \downarrow 0} \rho'(|\tilde{\alpha} p_i^k|) |p_i^k| = \rho'(0) |p_i^k| = \rho'(0) \sigma(v_i^k) p_i^k.$$

Therefore, according to Eq. (24) and  $f(\mathbf{x}) = l(\mathbf{x}) + r(\mathbf{x}) = l(\mathbf{x}) + \sum_{i=1}^n \rho(|x_i|)$ , we have

$$\begin{aligned} f'(\mathbf{x}^k; \mathbf{p}^k) &= \lim_{\alpha \downarrow 0} \frac{l(\mathbf{x}^k + \alpha \mathbf{p}^k) - l(\mathbf{x}^k)}{\alpha} + \sum_{i=1}^n \lim_{\alpha \downarrow 0} \frac{\rho(|x_i^k + \alpha p_i^k|) - \rho(|x_i^k|)}{\alpha} \\ &= \nabla l(\mathbf{x}^k)^T \mathbf{p}^k + \sum_{i \in \mathcal{A}_k} \rho'(|x_i^k|) \sigma(x_i^k) p_i^k + \sum_{i \in \mathcal{A}_k^c} \rho'(0) \sigma(v_i^k) p_i^k, \end{aligned}$$

where  $\mathcal{A}_k = \{i : x_i^k \neq 0\}$ ,  $\mathcal{A}_k^c = \{i : x_i^k = 0\}$ . Rearranging the above equality, we have

$$\begin{aligned} f'(\mathbf{x}^k; \mathbf{p}^k) &= \sum_{i \in \mathcal{A}_k} (\nabla_i l(\mathbf{x}^k) + \rho'(|x_i^k|) \sigma(x_i^k)) p_i^k + \sum_{i \in \mathcal{A}_k^c} (\nabla_i l(\mathbf{x}^k) + \rho'(0) \sigma(v_i^k)) p_i^k \\ &= \sum_{i=1}^n -v_i^k p_i^k = -(\mathbf{v}^k)^T \mathbf{p}^k < 0, \end{aligned}$$

where the second equality follows from the definition of  $\diamond_i f(\mathbf{x}^k)$  and  $v_i^k = -\diamond_i f(\mathbf{x}^k)$ ; the last inequality follows from  $\mathbf{p}^k = \pi(\mathbf{d}^k; \mathbf{v}^k)$  and the condition  $\mathbf{p}^k \neq \mathbf{0}$ .  $\square$

**Remark 5** *For a convex function, the directional derivative always exists. However, for a non-convex function, we are required to address the issue whether the directional derivative exists based on its definition.*

Based on Proposition 6, we prove Proposition 3 as follows:

**Proof of Proposition 3** (a) For QN-step, let's define

$$\mathcal{B}_k = \{i : x_i^k p_i^k < 0\} \text{ and } \bar{\alpha}_1^k = \begin{cases} \min_{i \in \mathcal{B}_k} \frac{|x_i^k|}{|p_i^k|}, & \text{if } \mathcal{B}_k \neq \emptyset, \\ +\infty, & \text{otherwise.} \end{cases}$$

Then for all  $\alpha \in (0, \bar{\alpha}_1^k)$ , we have

$$\mathbf{x}^k(\alpha) = \pi(\mathbf{x}^k + \alpha \mathbf{p}^k; \boldsymbol{\xi}^k) = \mathbf{x}^k + \alpha \mathbf{p}^k. \quad (25)$$

Define

$$s(\alpha) = f(\mathbf{x}^k + \alpha \mathbf{p}^k), \quad h(\alpha) = \frac{s(\alpha) - s(0)}{\alpha}.$$

Recalling the definition of the directional derivative in Eq. (24),  $\gamma \in (0, 1)$  and Proposition 6, we have

$$\lim_{\alpha \downarrow 0} \frac{s(\alpha) - s(0)}{\alpha} = -(\mathbf{v}^k)^T \mathbf{p}^k \leq -(\mathbf{v}^k)^T \mathbf{d}^k < -\gamma(\mathbf{v}^k)^T \mathbf{d}^k,$$

where the first inequality follows from  $v_i^k p_i^k \geq v_i^k d_i^k$  and the last inequality follows from  $\gamma \in (0, 1)$  and  $(\mathbf{v}^k)^T \mathbf{d}^k = (\mathbf{v}^k)^T H^k \mathbf{v}^k > 0$  whenever  $\mathbf{x}^k$  is not a Clarke critical point of problem (1). Thus, by recalling that  $h(\alpha)$  is continuous in  $(0, \infty)$ , there exists an  $\bar{\alpha}_2^k \in (0, \min(\alpha_0, \bar{\alpha}_1^k))$  such that

$$\frac{s(\alpha) - s(0)}{\alpha} \leq -\gamma(\mathbf{v}^k)^T \mathbf{d}^k, \quad \forall 0 < \alpha \leq \bar{\alpha}_2^k. \quad (26)$$

Thus, considering Eq. (26) and the backtracking form of the line search in QN-step (Eq. (4)), there exists an  $\alpha$  with  $\alpha \geq \bar{\alpha}^k = \beta \bar{\alpha}_2^k > 0$  such that

$$\frac{s(\alpha) - s(0)}{\alpha} \leq -\gamma(\mathbf{v}^k)^T \mathbf{d}^k. \quad (27)$$

Substituting the definition of  $s(\alpha)$  into Eq. (27) and considering that Eq. (25) holds for all  $\alpha \in (0, \bar{\alpha}_1^k)$ , we obtain that there exists an  $\alpha \in [\bar{\alpha}^k, \alpha_0]$  such that the line search criterion in Eq. (4) is satisfied.

(b) For GD-step, we have

$$\nabla l(\mathbf{x}^k)^T (\mathbf{x}^k(\alpha) - \mathbf{x}^k) + \frac{1}{2\alpha} \|\mathbf{x}^k(\alpha) - \mathbf{x}^k\|^2 + r(\mathbf{x}^k(\alpha)) \leq r(\mathbf{x}^k). \quad (28)$$

Noticing that  $\nabla l(\mathbf{x})$  is Lipschitz continuous with constant  $L$ , we have

$$l(\mathbf{x}^k(\alpha)) \leq l(\mathbf{x}^k) + \nabla l(\mathbf{x}^k)^T (\mathbf{x}^k(\alpha) - \mathbf{x}^k) + \frac{L}{2} \|\mathbf{x}^k(\alpha) - \mathbf{x}^k\|^2,$$

which together with Eq. (28) and  $f(\mathbf{x}) = l(\mathbf{x}) + r(\mathbf{x})$  implies that

$$f(\mathbf{x}^k(\alpha)) \leq f(\mathbf{x}^k) - \frac{1 - \alpha L}{2\alpha} \|\mathbf{x}^k(\alpha) - \mathbf{x}^k\|^2.$$

Thus, the line search in Eq. (5) is satisfied if

$$\gamma \leq 1 - \alpha L \text{ and } 0 < \alpha \leq \alpha_0.$$

Considering the backtracking form of the line search in GD-step (Eq. (5)), we obtain that the line search criterion in Eq. (5) is satisfied whenever  $\alpha \geq \beta \min(\alpha_0, (1 - \gamma)/L)$ .  $\square$

## E BFGS and L-BFGS

Assume that we are given an approximate inverse Hessian matrix  $H^k$  at  $\mathbf{x} = \mathbf{x}^k$ . BFGS updates the inverse Hessian matrix  $H^{k+1}$  at  $\mathbf{x} = \mathbf{x}^{k+1}$  as:

$$H^{k+1} = (V^k)^T H^k V^k + \rho^k \mathbf{s}^k (\mathbf{s}^k)^T, \quad (29)$$

where  $V^k = I - \rho^k \mathbf{y}^k (\mathbf{s}^k)^T$ ,  $\mathbf{s}^k = \mathbf{x}^{k+1} - \mathbf{x}^k$ ,  $\mathbf{y}^k = \nabla l(\mathbf{x}^{k+1}) - \nabla l(\mathbf{x}^k)$ ,  $\rho^k = ((\mathbf{y}^k)^T \mathbf{s}^k)^{-1}$ . It is easy to verify that  $H^{k+1} \succ 0$ , if  $H^k \succ 0$  and  $\rho^k > 0$  [15].

L-BFGS [15] updates the inverse Hessian matrix by unrolling the update from BFGS back to  $m$  steps:

$$\begin{aligned}
H^k &= (V^{k-1})^T H^{k-1} V^{k-1} + \rho^{k-1} \mathbf{s}^{k-1} (\mathbf{s}^{k-1})^T \\
&= (V^{k-1})^T (V^{k-2})^T H^{k-2} V^{k-2} V^{k-1} \\
&\quad + (V^{k-1})^T \mathbf{s}^{k-2} \rho^{k-2} (\mathbf{s}^{k-2})^T V^{k-1} \\
&\quad + \rho^{k-1} \mathbf{s}^{k-1} (\mathbf{s}^{k-1})^T \\
&= (U^{k,m})^T H^{k-m} U^{k,m} \\
&\quad + \rho^{k-m} (U^{k,m-1})^T \mathbf{s}^{k-m} (\mathbf{s}^{k-m})^T U^{k,m-1} \\
&\quad + \rho^{k-m+1} (U^{k,m-2})^T \mathbf{s}^{k-m+1} (\mathbf{s}^{k-m+1})^T U^{k,m-2} \\
&\quad + \dots \\
&\quad + \rho^{k-2} (V^{k-1})^T \mathbf{s}^{k-2} (\mathbf{s}^{k-2})^T V^{k-1} \\
&\quad + \rho^{k-1} \mathbf{s}^{k-1} (\mathbf{s}^{k-1})^T,
\end{aligned} \tag{30}$$

where  $U^{k,m} = V^{k-m} V^{k-m+1} \dots V^{k-1}$ . For the L-BFGS, we need *not* explicitly store the approximated inverse Hessian matrix. Instead, we only require matrix-vector multiplications at each iteration, which can be implemented by a two-loop recursion with a time complexity of  $O(mn)$  [15]. Thus, we only store  $2m$  vectors of length  $n$ :  $\mathbf{s}^{k-1}, \mathbf{s}^{k-2}, \dots, \mathbf{s}^{k-m}$  and  $\mathbf{y}^{k-1}, \mathbf{y}^{k-2}, \dots, \mathbf{y}^{k-m}$  with a storage complexity of  $O(mn)$ , which is very useful when  $n$  is large. In practice, L-BFGS updates  $H^{k-m}$  as  $\mu^k I$ , where  $\mu^k = \min(10^{10}, \max(10^{-10}, (\mathbf{s}^k)^T \mathbf{y}^k / \|\mathbf{y}^k\|^2))$ .

## F Properties of L-BFGS

We first show that some key sequences are bounded, which are critical for establishing some important properties of L-BFGS.

**Proposition 7** *The sequence  $\{\mathbf{x}^k\}$  generated by the HONOR algorithm is bounded. Let  $\mathbf{s}^k = \mathbf{x}^{k+1} - \mathbf{x}^k$ ,  $\mathbf{y}^k = \nabla l(\mathbf{x}^{k+1}) - \nabla l(\mathbf{x}^k)$ . Then  $\{\mathbf{s}^k\}$ ,  $\{\mathbf{y}^k\}$  and  $\{\mathbf{v}^k\}$  are also bounded.*

**Proof** Proposition 3 guarantees that both line search criteria in QN-step (Eq. (4)) and GD-step (Eq. (5)) can be satisfied in a finite number of trials with some  $\alpha^k > 0$ . Thus, we have

$$\begin{aligned}
f(\mathbf{x}^k) - f(\mathbf{x}^{k+1}) &\geq \gamma \alpha^k (\mathbf{v}^k)^T \mathbf{d}^k = \gamma \alpha^k (\mathbf{v}^k)^T H^k \mathbf{v}^k \geq 0 \text{ (QN-step),} \\
\text{or } f(\mathbf{x}^k) - f(\mathbf{x}^{k+1}) &\geq \frac{\gamma}{2\alpha^k} \|\mathbf{x}^{k+1} - \mathbf{x}^k\|^2 \geq 0 \text{ (GD-step),}
\end{aligned} \tag{31}$$

which imply that  $\{f(\mathbf{x}^k)\}$  is decreasing. Hence for all  $k \geq 1$ ,  $f(\mathbf{x}^k) \leq f(\mathbf{x}^0)$ . Assume that  $\{\mathbf{x}^k\}$  is unbounded. Then there exists a subsequence  $\{\mathbf{x}^k\}_{\tilde{k}}$  such that  $\{l(\mathbf{x}^k)\}_{\tilde{k}} \rightarrow \infty$ , because  $l(\mathbf{x})$  is coercive based on the assumption (A1). Recall that  $r(\mathbf{x}) \geq 0$  according to the assumption (A2). Thus, we have  $\{f(\mathbf{x}^k)\}_{\tilde{k}} \rightarrow \infty$ , which leads to a contradiction with that  $f(\mathbf{x}^k) \leq f(\mathbf{x}^0), \forall k \geq 1$ . Therefore,  $\{\mathbf{x}^k\}$  is bounded, which immediately imply that  $\{\mathbf{s}^k\}$  is also bounded. Recalling that  $\nabla l(\mathbf{x})$  is Lipschitz continuous with constant, we obtain that  $\|\mathbf{y}^k\| \leq L \|\mathbf{x}^k - \mathbf{x}^{k+1}\|$  and hence  $\{\mathbf{y}^k\}$  is bounded. Since  $-\mathbf{v}^k \in \partial^o f(\mathbf{x}^k)$  and  $\{\mathbf{x}^k\}$  is bounded, then based on Proposition 4, we obtain that  $\{\mathbf{v}^k\}$  is bounded.  $\square$

Based on Proposition 7, we present the following important properties of L-BFGS.

**Proposition 8** *In the course of the inversion Hessian matrix update using L-BFGS, let  $\{H^0\}$  and  $\{H^{k-m}\}$  be bounded and positive definite, and  $\{\mathbf{x}^k\}$ ,  $\{\mathbf{s}^k\}$ ,  $\{\mathbf{v}^k\}$ ,  $\{\mathbf{y}^k\}$  and  $\{\rho^k\}$  be bounded, where  $\mathbf{s}^k = \mathbf{x}^{k+1} - \mathbf{x}^k$ ,  $\mathbf{y}^k = \nabla l(\mathbf{x}^{k+1}) - \nabla l(\mathbf{x}^k)$  and  $\rho^k = ((\mathbf{y}^k)^T \mathbf{s}^k)^{-1}$ . Then there exists a positive constant  $M$  such that for all  $\mathbf{x} \in \mathbb{R}^n$  and all  $k \geq 1$ :  $\mathbf{x}^T H^k \mathbf{x} \leq M \|\mathbf{x}\|^2$ . That is, the eigenvalues of  $H^k$  are uniformly bounded from above by  $M$ . Moreover,  $\{\mathbf{d}^k\}$  and  $\{\mathbf{p}^k\}$  are bounded.*

**Proof** When  $k \leq m$  ( $m$  is the unrolling steps of L-BFGS), L-BFGS is equivalent to BFGS and  $H^k$  is updated by the recursive relationship in Eq. (29). When  $k > m$ ,  $H^k$  is updated by the recursive relationship in Eq. (30). Thus, Eqs. (29), (30) and the boundedness of  $\{H^0\}$ ,  $\{H^{k-m}\}$ ,  $\{\mathbf{s}^k\}$ ,  $\{\mathbf{y}^k\}$ ,  $\{\mathbf{v}^k\}$  and  $\{\rho^k\}$  immediately imply that  $\{\|H^k\|_F\}$  is bounded. That is, there exist an  $M > 0$  such that  $\|H^k\|_F \leq M$  for all  $k \geq 1$ . Thus, for all  $k \geq 1$ ,  $\lambda_{\max}(H^k) \leq \|H^k\|_F \leq M$ , where  $\lambda_{\max}(H^k)$  is the largest eigenvalue of  $H^k$ . That is, there exists a positive constant  $M$  such that for all  $\mathbf{x} \in \mathbb{R}^n$  and all  $k \geq 1$ :  $\mathbf{x}^T H^k \mathbf{x} \leq M \|\mathbf{x}\|^2$ . Thus, the eigenvalues of  $H^k$  are uniformly bounded from above by  $M$ . It easily follows that  $\{\mathbf{d}^k\}$  and  $\{\mathbf{p}^k\}$  are bounded by noticing that  $\{\mathbf{v}^k\}$  is bounded.  $\square$

**Remark 6** We discuss how to guarantee that the conditions in Proposition 8 are satisfied in practical L-BFGS updates. We usually choose  $H^0$  and  $H^{k-m}$  as multiple identity matrices such that  $\{H^0\}$  and  $\{H^{k-m}\}$  are bounded and positive definite. Proposition 7 guarantees that  $\{\mathbf{x}^k\}$ ,  $\{\mathbf{s}^k\}$ ,  $\{\mathbf{v}^k\}$  and  $\{\mathbf{y}^k\}$  are bounded. To guarantee that  $\{\rho^k\}$  is also bounded, we adopt a similar strategy presented in [5, 11]: choose a small positive constant  $\delta$  and perform L-BFGS updates only when  $(\mathbf{s}^k)^T \mathbf{y}^k \geq \delta$ .

**Remark 7** To guarantee the eigenvalues of  $H^k$  are uniformly bounded from below by a positive constant, we can add a small positive diagonal matrix  $\nu I$  to  $H^k$  (e.g.,  $\nu = 10^{-12}$ ). Thus, the eigenvalues of  $H^k$  are both uniformly bounded from below by  $\nu$  and uniformly bounded from above by  $M$ , respectively.
